# Supplementary material for: Spatiotemporal evaporating droplet dynamics on fomites enhances long term bacterial pathogenesis
Source: PubMed Central journal article supplement (PMC8501104; doi:10.1038/s42003-021-02711-z), 2021-10-08
Supplement: 42003_2021_2711_MOESM2_ESM.pdf [file 42003_2021_2711_MOESM2_ESM.pdf]

# Supplementary Materials for

## Spatiotemporal evaporating droplet dynamics on fomites enhances long term bacterial pathogenesis

Sreeparna Majee<sup>1</sup>, Atish Roy Chowdhury<sup>2</sup>, Roven Pinto<sup>1+</sup>, Ankur Chattopadhyay<sup>1+</sup>, Amey Nitin Agharkar<sup>3</sup>, Dipshikha Chakravorty<sup>2\*</sup>, Saptarshi Basu<sup>1,3\*\*</sup>

\*\*To whom correspondence should be addressed; E-mail: [sbasu@iisc.ac.in](mailto:sbasu@iisc.ac.in).

\*Co-Corresponding author; E-mail: [dipa@iisc.ac.in](mailto:dipa@iisc.ac.in).

+These authors contributed equally to the work.

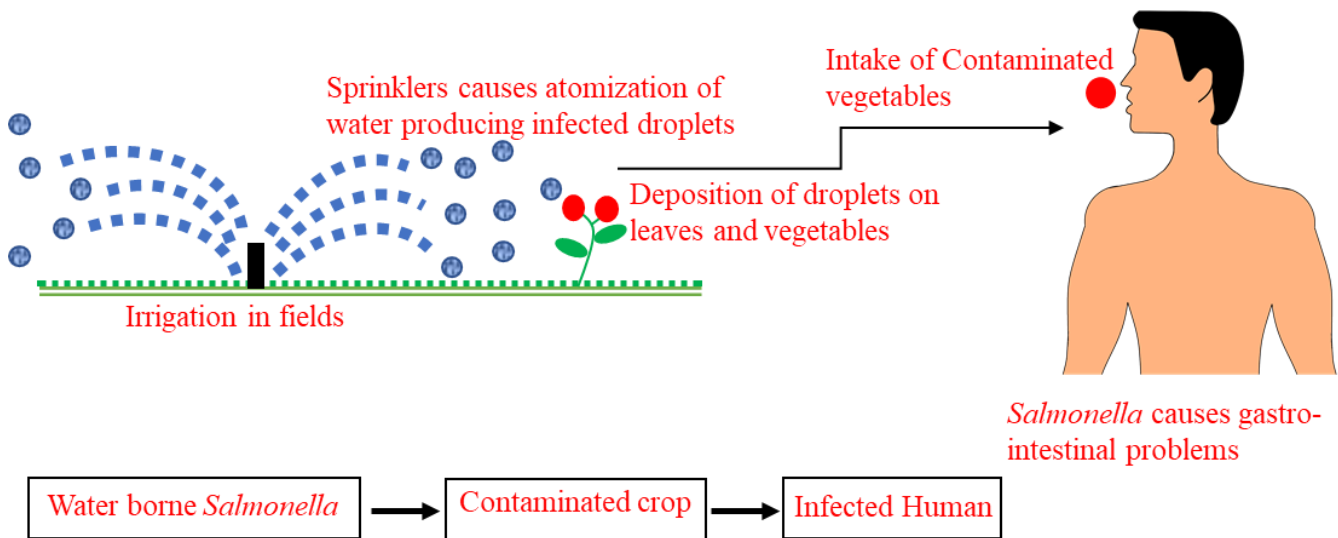

**Supplementary Figure 1.**

**Schematic diagram.** Contamination through droplets produced during irrigation.

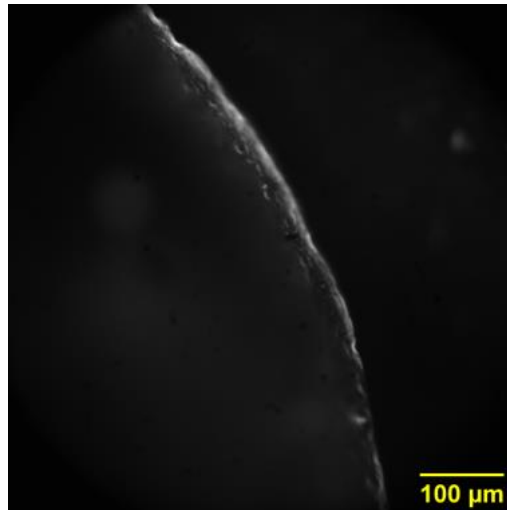

**Supplementary Figure 2.**

**Fluorescence image (measured at 50X):** Dried precipitate of 0.6 wt% mucin containing STM (WT) on tomato skin.

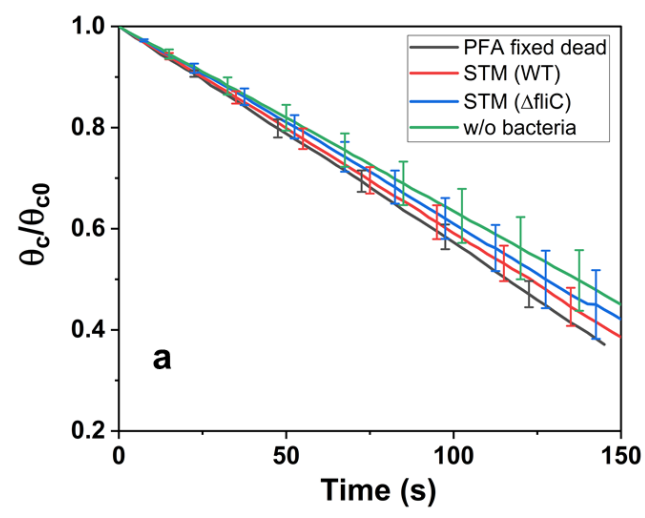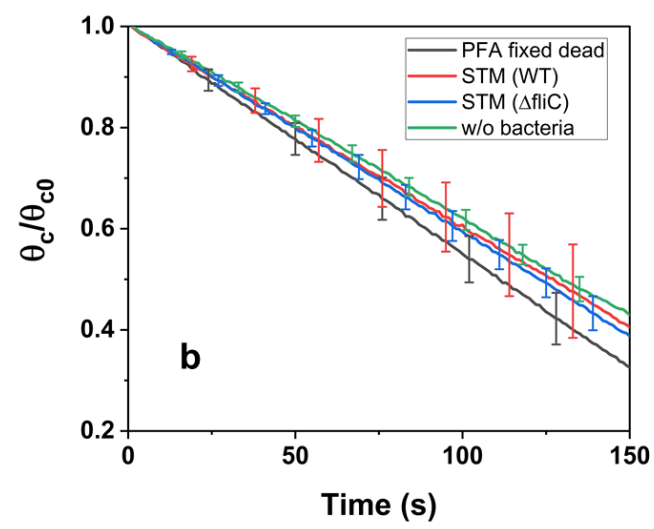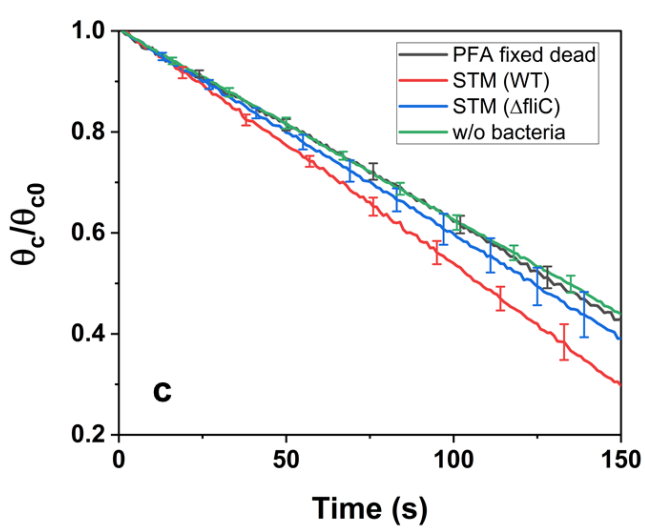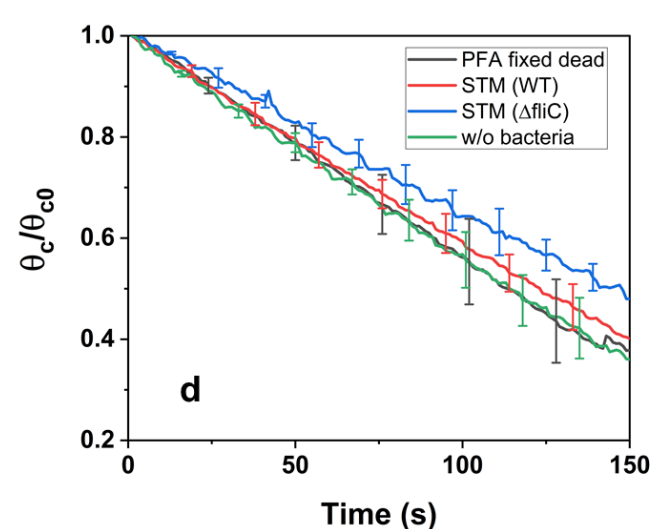

**Supplementary Figure 3.**

**Contact angle vs. time.** Variation in normalized contact angle with time for four mediums (a) Saline (0.9wt%), (b) Milli-Q, (c) Dextrose (5wt%), (d) Mucin (0.6wt%)

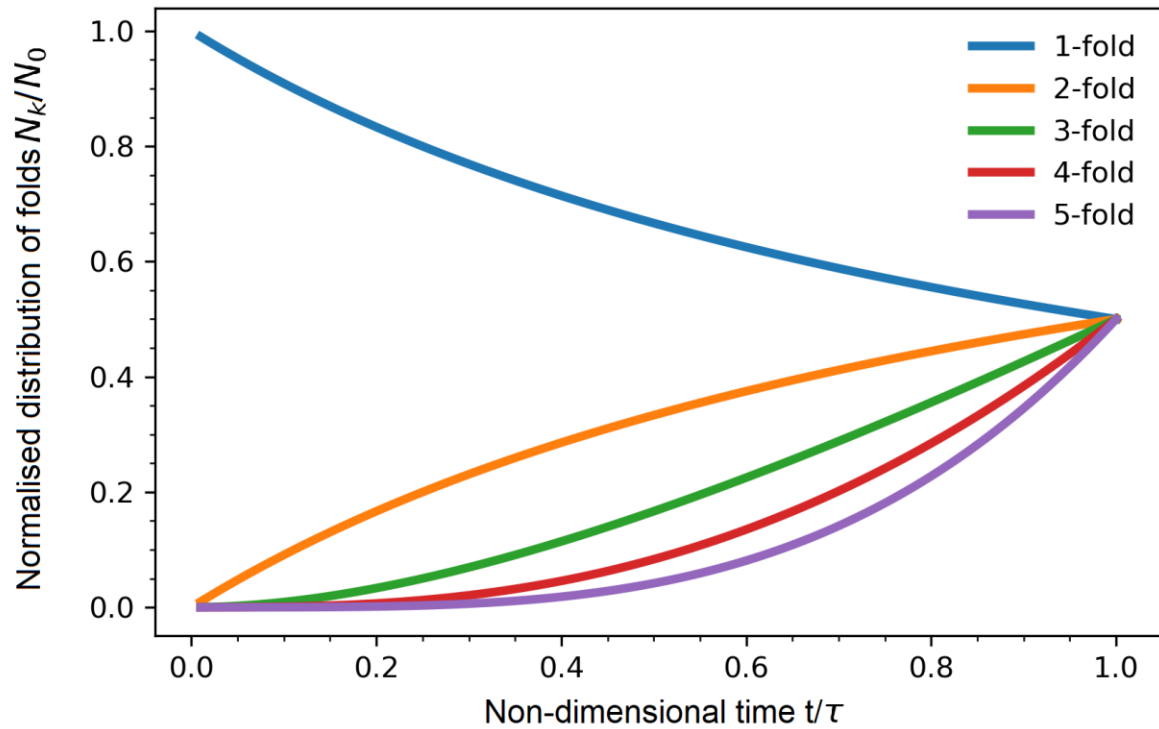

**Supplementary Figure 4.**

**Normalized distribution of folds with time.** Fold generation of bacteria (1-5 folds) given in Model B in the control volume mentioned in the main text. The time is normalized with  $\tau$  which is the characteristic time of aggregation.

**Supplementary Table 1.**

Viscosity of different mediums in mPa.s.

| <b>Fluid Mediums (w/o bacteria)</b> | <b>Viscosity (mPa.s)</b> |
|-------------------------------------|--------------------------|
| <b>Milli-Q</b>                      | <b>1.1</b>               |
| <b>Saline (0.9wt%)</b>              | <b>1.2</b>               |
| <b>Dextrose (5wt%)</b>              | <b>1.3</b>               |
| <b>Dextrose (0.9wt%)</b>            | <b>1.2</b>               |
| <b>Mucin (0.6wt%)</b>               | <b>1.7</b>               |
| <b>Mucin (0.1wt%)</b>               | <b>1.3</b>               |

**Supplementary Table 2.**

Surface tension of different mediums in mN/m.

| <b>Fluid Medium</b>    | <b>w/o bacteria</b>              | <b>PFA fixed dead</b>            | <b>STM (WT)</b>                  | <b>STM (<math>\Delta f_{liC}</math>)</b> |
|------------------------|----------------------------------|----------------------------------|----------------------------------|------------------------------------------|
| <b>Saline (0.9wt%)</b> | <b>70.9 <math>\pm</math> 2.7</b> | <b>70.7 <math>\pm</math> 3.2</b> | <b>70.4 <math>\pm</math> 3.1</b> | <b>70.6 <math>\pm</math> 1.8</b>         |
| <b>Milli-Q</b>         | <b>70.7 <math>\pm</math> 1.8</b> | <b>71.7 <math>\pm</math> 2.7</b> | <b>70.4 <math>\pm</math> 1.8</b> | <b>70.8 <math>\pm</math> 2.5</b>         |
| <b>Dextrose (5wt%)</b> | <b>71.6 <math>\pm</math> 1.9</b> | <b>70.8 <math>\pm</math> 1.9</b> | <b>71.3 <math>\pm</math> 2.4</b> | <b>71.7 <math>\pm</math> 3.3</b>         |
| <b>Mucin (0.6wt%)</b>  | <b>71.8 <math>\pm</math> 2.8</b> | <b>70.6 <math>\pm</math> 2.7</b> | <b>70.4 <math>\pm</math> 3.2</b> | <b>70.7 <math>\pm</math> 2.8</b>         |
