# Supplementary material for: Spatiotemporal evaporating droplet dynamics on fomites enhances long term bacterial pathogenesis
Source: PubMed Central journal article supplement (PMC8501104; doi:10.1038/s42003-021-02711-z), 2021-10-08
Supplement: 42003_2021_2711_MOESM3_ESM.pdf [file 42003_2021_2711_MOESM3_ESM.pdf]

## Description of Additional Supplementary Files

**File name:** Supplementary Movie 1.

**Description:** Capillary Flow. Bacteria showing capillary flow (Saline (0.9wt%)  $\Delta$ fliC).

**File name:** Supplementary Movie 2.

**Description:** Live cell imaging of Salmonella Typhimurium towards the edge of the droplet in Dextrose (5wt%) medium. The edge of the droplet is imaged under 63x magnification by Leica SP8 confocal microscope focusing on the flow dynamics in dextrose medium.

**File name:** Supplementary Movie 3.

**Description:** Live cell imaging of Salmonella Typhimurium towards the edge of the droplet in Mucin (0.6wt%) medium. The edge of the droplet is imaged under 63x magnification by Leica SP8 confocal microscope focusing on the flow dynamics in mucin medium.

**File name:** Supplementary Movie 4.

**Description:** Comparison between dead and STM WT bacteria flowing towards the edge of the droplet in Saline (0.9wt%) medium. Simultaneous live cell imaging of droplet edge with dead and STM WT bacteria in saline solution captured under 63x magnification by Leica SP8 confocal microscope.

**File name:** Supplementary Data 1.

**Description:** Data for fluorescence intensity at the edge for dead bacteria, STM (WT) and STM ( $\Delta$ fliC) in saline medium.

**File name:** Supplementary Data 2.

**Description:** Data for fluorescence intensity at the edge for dead bacteria, STM (WT) and STM ( $\Delta$ fliC) in milli-Q medium.

**File name:** Supplementary Data 3.

**Description:** Data for radial profilometry for dead bacteria, STM (WT) and STM ( $\Delta$ fliC) in dextrose.

**File name:** Supplementary Data 4.

**Description:** Data for radial profilometry for dead bacteria, STM (WT) and STM ( $\Delta$ fliC) in mucin.

**File name:** Supplementary Data 5.

**Description:** Data for velocity profiles for saline and Page 8 of 18 nutrient rich media at the later stages of evaporation.

**File name:** Supplementary Data 6.

**Description:** Data for normalized contact angle variation with time for saline, mucin and dextrose.

**File name:** Supplementary Data 7.

**Description:** Data for the viability of wild type and fliC deficient strains of Salmonella.

**File name:** Supplementary Data 8.

**Description:** Data for viable Salmonella Typhimurium present in fomite can cause infection in mouse model.

**File name:** Supplementary Data 9.

**Description:** Data for variation in normalized contact angle with time for Saline (0.9wt%).

**File name:** Supplementary Data 10.

**Description:** Data for variation in normalized contact angle with time for Milli-Q.

**File name:** Supplementary Data 11.

**Description:** Data for variation in normalized contact angle with time for Dextrose (5wt%).

**File name:** Supplementary Data 12.

**Description:** Data for variation in normalized contact angle with time for Mucin (0.6wt%).
